# Supplementary material for: Complete genome sequence, metabolic model construction, and huangjiu application of Saccharopolyspora rosea A22, a thermophilic, high amylase and glucoamylase actinomycetes
Source: Front Microbiol. 2022 Sep 28;13:995978. doi: 10.3389/fmicb.2022.995978 (PMC9554608; doi:10.3389/fmicb.2022.995978)
Supplement: Supplementary file 2 [file Table_11.xlsx]

## Sheet: Carbon-Arabinose
compounds	name	formula	minFlux	maxFlux	concentration
cpd00224	L-Arabinose	C5H10O5	-100	100	0.001
cpd00009	Phosphate	HO4P	-100	5	0.001
cpd00048	Sulfate	O4S	-100	5	0.001
cpd00067	H+	H	-100	100	0.001
cpd00001	H2O	H2O	-100	100	0.001
cpd00205	K+	K	-100	100	0.001
cpd00254	Mg	Mg	-100	100	0.001
cpd00971	Na+	Na	-100	100	0.001
cpd00007	O2	O2	-100	100	0.001
cpd00099	Cl-	Cl	-100	100	0.001
cpd10515	Fe+2	Fe	-100	100	0.001
cpd00209	Nitrate	NO3	-100	100	0.001
cpd00011	CO2	CO2	-100	0	0.001
cpd00063	Ca2+	Ca	-100	100	0.001
cpd10516	Fe+3	Fe	-100	100	0.001
cpd00058	Cu2+	Cu	-100	100	0.001
cpd00149	Co2+	Co	-100	100	0.001
cpd00030	Mn2+	Mn	-100	100	0.001
cpd00034	Zn2+	Zn	-100	100	0.001

## Sheet: Carbon-D-starch
compounds	name	formula	minFlux	maxFlux	concentration
cpd11657	Starch	C12H20O10R2	-100	100	0.001
cpd00009	Phosphate	HO4P	-100	5	0.001
cpd00048	Sulfate	O4S	-100	5	0.001
cpd00067	H+	H	-100	100	0.001
cpd00001	H2O	H2O	-100	100	0.001
cpd00205	K+	K	-100	100	0.001
cpd00254	Mg	Mg	-100	100	0.001
cpd00971	Na+	Na	-100	100	0.001
cpd00007	O2	O2	-100	100	0.001
cpd00099	Cl-	Cl	-100	100	0.001
cpd10515	Fe+2	Fe	-100	100	0.001
cpd00209	Nitrate	NO3	-100	100	0.001
cpd00011	CO2	CO2	-100	0	0.001
cpd00063	Ca2+	Ca	-100	100	0.001
cpd10516	Fe+3	Fe	-100	100	0.001
cpd00058	Cu2+	Cu	-100	100	0.001
cpd00149	Co2+	Co	-100	100	0.001
cpd00030	Mn2+	Mn	-100	100	0.001
cpd00034	Zn2+	Zn	-100	100	0.001

## Sheet: Carbon-trehalose
compounds	name	formula	minFlux	maxFlux	concentration
cpd00794	TRHL	C12H22O11	-100	100	0.001
cpd00009	Phosphate	HO4P	-100	5	0.001
cpd00048	Sulfate	O4S	-100	5	0.001
cpd00067	H+	H	-100	100	0.001
cpd00001	H2O	H2O	-100	100	0.001
cpd00205	K+	K	-100	100	0.001
cpd00254	Mg	Mg	-100	100	0.001
cpd00971	Na+	Na	-100	100	0.001
cpd00007	O2	O2	-100	100	0.001
cpd00099	Cl-	Cl	-100	100	0.001
cpd10515	Fe+2	Fe	-100	100	0.001
cpd00209	Nitrate	NO3	-100	100	0.001
cpd00011	CO2	CO2	-100	0	0.001
cpd00063	Ca2+	Ca	-100	100	0.001
cpd10516	Fe+3	Fe	-100	100	0.001
cpd00058	Cu2+	Cu	-100	100	0.001
cpd00149	Co2+	Co	-100	100	0.001
cpd00030	Mn2+	Mn	-100	100	0.001
cpd00034	Zn2+	Zn	-100	100	0.001

## Sheet: D-Glucose
compounds	name	formula	minFlux	maxFlux	concentration
cpd00027	D-Glucose	C6H12O6	-100	100	0.001
cpd00009	Phosphate	HO4P	-100	5	0.001
cpd00048	Sulfate	O4S	-100	5	0.001
cpd00067	H+	H	-100	100	0.001
cpd00001	H2O	H2O	-100	100	0.001
cpd00205	K+	K	-100	100	0.001
cpd00254	Mg	Mg	-100	100	0.001
cpd00971	Na+	Na	-100	100	0.001
cpd00007	O2	O2	-100	100	0.001
cpd00099	Cl-	Cl	-100	100	0.001
cpd10515	Fe+2	Fe	-100	100	0.001
cpd00209	Nitrate	NO3	-100	100	0.001
cpd00011	CO2	CO2	-100	0	0.001
cpd00063	Ca2+	Ca	-100	100	0.001
cpd10516	Fe+3	Fe	-100	100	0.001
cpd00058	Cu2+	Cu	-100	100	0.001
cpd00149	Co2+	Co	-100	100	0.001
cpd00030	Mn2+	Mn	-100	100	0.001
cpd00034	Zn2+	Zn	-100	100	0.001

## Sheet: D-Mannitol
compounds	name	formula	minFlux	maxFlux	concentration
cpd00314	D-Mannitol	C6H14O6	-100	100	0.001
cpd00009	Phosphate	HO4P	-100	5	0.001
cpd00048	Sulfate	O4S	-100	5	0.001
cpd00067	H+	H	-100	100	0.001
cpd00001	H2O	H2O	-100	100	0.001
cpd00205	K+	K	-100	100	0.001
cpd00254	Mg	Mg	-100	100	0.001
cpd00971	Na+	Na	-100	100	0.001
cpd00007	O2	O2	-100	100	0.001
cpd00099	Cl-	Cl	-100	100	0.001
cpd10515	Fe+2	Fe	-100	100	0.001
cpd00209	Nitrate	NO3	-100	100	0.001
cpd00011	CO2	CO2	-100	0	0.001
cpd00063	Ca2+	Ca	-100	100	0.001
cpd10516	Fe+3	Fe	-100	100	0.001
cpd00058	Cu2+	Cu	-100	100	0.001
cpd00149	Co2+	Co	-100	100	0.001
cpd00030	Mn2+	Mn	-100	100	0.001
cpd00034	Zn2+	Zn	-100	100	0.001

## Sheet: D-Mannose
compounds	name	formula	minFlux	maxFlux	concentration
cpd00138	D-Mannose	C6H12O6	-100	100	0.001
cpd00009	Phosphate	HO4P	-100	5	0.001
cpd00048	Sulfate	O4S	-100	5	0.001
cpd00067	H+	H	-100	100	0.001
cpd00001	H2O	H2O	-100	100	0.001
cpd00205	K+	K	-100	100	0.001
cpd00254	Mg	Mg	-100	100	0.001
cpd00971	Na+	Na	-100	100	0.001
cpd00007	O2	O2	-100	100	0.001
cpd00099	Cl-	Cl	-100	100	0.001
cpd10515	Fe+2	Fe	-100	100	0.001
cpd00209	Nitrate	NO3	-100	100	0.001
cpd00011	CO2	CO2	-100	0	0.001
cpd00063	Ca2+	Ca	-100	100	0.001
cpd10516	Fe+3	Fe	-100	100	0.001
cpd00058	Cu2+	Cu	-100	100	0.001
cpd00149	Co2+	Co	-100	100	0.001
cpd00030	Mn2+	Mn	-100	100	0.001
cpd00034	Zn2+	Zn	-100	100	0.001

## Sheet: Carbon-fructose 
compounds	name	formula	minFlux	maxFlux	concentration
cpd00082	D-Fructose	C6H12O6	-100	100	0.001
cpd00009	Phosphate	HO4P	-100	5	0.001
cpd00048	Sulfate	O4S	-100	5	0.001
cpd00067	H+	H	-100	100	0.001
cpd00001	H2O	H2O	-100	100	0.001
cpd00205	K+	K	-100	100	0.001
cpd00254	Mg	Mg	-100	100	0.001
cpd00971	Na+	Na	-100	100	0.001
cpd00007	O2	O2	-100	100	0.001
cpd00099	Cl-	Cl	-100	100	0.001
cpd00011	CO2	CO2	-100	0	0.001
cpd00063	Ca2+	Ca	-100	100	0.001
cpd10516	Fe+3	Fe	-100	100	0.001
cpd00149	Co2+	Co	-100	100	0.001
cpd00030	Mn2+	Mn	-100	100	0.001
cpd00034	Zn2+	Zn	-100	100	0.001
cpd00209	Nitrate	NO3	-100	100	0.001

## Sheet: Carbon-Galactose
compounds	name	formula	minFlux	maxFlux	concentration
cpd00108	Galactose	C6H12O6	-100	100	0.001
cpd00009	Phosphate	HO4P	-100	5	0.001
cpd00048	Sulfate	O4S	-100	5	0.001
cpd00067	H+	H	-100	100	0.001
cpd00001	H2O	H2O	-100	100	0.001
cpd00205	K+	K	-100	100	0.001
cpd00254	Mg	Mg	-100	100	0.001
cpd00971	Na+	Na	-100	100	0.001
cpd00007	O2	O2	-100	100	0.001
cpd00099	Cl-	Cl	-100	100	0.001
cpd10515	Fe+2	Fe	-100	100	0.001
cpd00209	Nitrate	NO3	-100	100	0.001
cpd00011	CO2	CO2	-100	0	0.001
cpd00063	Ca2+	Ca	-100	100	0.001
cpd10516	Fe+3	Fe	-100	100	0.001
cpd00058	Cu2+	Cu	-100	100	0.001
cpd00149	Co2+	Co	-100	100	0.001
cpd00030	Mn2+	Mn	-100	100	0.001
cpd00034	Zn2+	Zn	-100	100	0.001

## Sheet: Carbon-lactose
compounds	name	formula	minFlux	maxFlux	concentration
cpd00156	L-Valine	C5H11NO2	-100	100	0.001
cpd00009	Phosphate	HO4P	-100	5	0.001
cpd00048	Sulfate	O4S	-100	5	0.001
cpd00067	H+	H	-100	100	0.001
cpd00001	H2O	H2O	-100	100	0.001
cpd00205	K+	K	-100	100	0.001
cpd00254	Mg	Mg	-100	100	0.001
cpd00971	Na+	Na	-100	100	0.001
cpd00007	O2	O2	-100	100	0.001
cpd00099	Cl-	Cl	-100	100	0.001
cpd10515	Fe+2	Fe	-100	100	0.001
cpd00011	CO2	CO2	-100	0	0.001
cpd00063	Ca2+	Ca	-100	100	0.001
cpd10516	Fe+3	Fe	-100	100	0.001
cpd00058	Cu2+	Cu	-100	100	0.001
cpd00149	Co2+	Co	-100	100	0.001
cpd00030	Mn2+	Mn	-100	100	0.001
cpd00034	Zn2+	Zn	-100	100	0.001
cpd01354	beta-Lactose	C12H22O11	-100	100	0.001

## Sheet: L-Arabitol
compounds	name	formula	minFlux	maxFlux	concentration
cpd00417	L-Lyxitol	C5H12O5	-100	100	0.001
cpd00009	Phosphate	HO4P	-100	5	0.001
cpd00048	Sulfate	O4S	-100	5	0.001
cpd00067	H+	H	-100	100	0.001
cpd00001	H2O	H2O	-100	100	0.001
cpd00205	K+	K	-100	100	0.001
cpd00254	Mg	Mg	-100	100	0.001
cpd00971	Na+	Na	-100	100	0.001
cpd00007	O2	O2	-100	100	0.001
cpd00099	Cl-	Cl	-100	100	0.001
cpd10515	Fe+2	Fe	-100	100	0.001
cpd00209	Nitrate	NO3	-100	100	0.001
cpd00011	CO2	CO2	-100	0	0.001
cpd00063	Ca2+	Ca	-100	100	0.001
cpd10516	Fe+3	Fe	-100	100	0.001
cpd00058	Cu2+	Cu	-100	100	0.001
cpd00149	Co2+	Co	-100	100	0.001
cpd00030	Mn2+	Mn	-100	100	0.001
cpd00034	Zn2+	Zn	-100	100	0.001

[truncated: 13 more sheets: Carbon-Xylose, Carbon-D-Raffinose, Carbon-L-Rhamnose, Carbon- sorbitol, Nitrogen-L-Histidine, Nitrogen-L-Phenylalanine, Nitrogen-L-Tyrosine, Nitrogen-L-Valine, Nitrogen-Nitrate, Nitrogen-Urea, Nitrogen-xanthine, Nitrogen-hypoxanthine, Nitrogen-Casein]
